# Supplementary material
Source: publisher site journal article supplement (https://www.dovepress.com/article/427774)
Supplement: Supplementary file 1 [file get_supplementary_file.php]

Supplementary Table S1. Risk factors of male subjects in the COPD and non-COPD groups from the KNHANES

|  | Total  (*n* = 7701) | COPD group  (*n* = 1729) | Non-COPD group  (*n* = 5972) | *p*-value |
| --- | --- | --- | --- | --- |
| Risk factors |  |  |  |  |
| C (cigarette smoking) | 4841 (62.9%) | 1278 (73.9%) | 3563 (59.7%) | <0.001 |
| I (infection) | 442 (5.7%) | 162 (9.4%) | 280 (4.7%) | <0.001 |
| P (pollution) | 640 (8.3%) | 170 (9.8%) | 470 (7.9%) | 0.009 |
| A (asthma) | 151 (2.0%) | 96 (5.6%) | 55 (0.9%) | <0.001 |
| U (unidentified) | 2448 (31.8%) | 348 (20.1%) | 2100 (35.2%) | <0.001 |
| Number of risk factors among the above four | |  |  | <0.001 |
| 0 | 2448 (31.8%) | 348 (20.1%) | 2100 (35.2%) |  |
| 1 | 4472 (58.1%) | 1082 (62.6%) | 3390 (56.8%) |  |
| 2 | 741 (9.6%) | 273 (15.8%) | 468 (7.8%) |  |
| 3 | 40 (0.5%) | 26 (1.5%) | 14 (0.2%) |  |
| 4 | 0 (0.0%) | 0 (0.0%) | 0 (0.0%) |  |
| C only | 4094 (53.2%) | 992 (57.4%) | 3102 (51.9%) | <0.001 |
| I only | 145 (1.9%) | 38 (2.2%) | 107 (1.8%) | 0.274 |
| P only | 192 (2.5%) | 34 (2.0%) | 158 (2.6%) | 0.111 |
| A only | 41 (0.5%) | 18 (1.0%) | 23 (0.4%) | 0.001 |
| C + I | 237 (3.1%) | 96 (5.6%) | 141 (2.4%) | <0.001 |
| C + P | 393 (5.1%) | 111 (6.4%) | 282 (4.7%) | 0.005 |
| C + A | 78 (1.0%) | 53 (3.1%) | 25 (0.4%) | <0.001 |
| I + P | 21 (0.3%) | 5 (0.3%) | 16 (0.3%) | 0.798 |
| I + A | 6 (0.1%) | 3 (0.2%) | 3 (0.1%) | 0.131 |
| P + A | 6 (0.1%) | 5 (0.3%) | 1 (0.0%) | 0.003 |
| C + I + P | 20 (0.3%) | 9 (0.5%) | 11 (0.2%) | 0.027 |
| C + I + A | 12 (0.2%) | 11 (0.6%) | 1 (0.0%) | <0.001 |
| C + P + A | 7 (0.1%) | 6 (0.3%) | 1 (0.0%) | <0.001 |
| I + P + A | 1 (0.0%) | 0 (0.0%) | 1 (0.0%) | 0.448 |

The frequency of exposure to risk factors in male subjects from the KNHANES (data of the general population). We classified study subjects into two groups of COPD vs*.* non-COPD. COPD was defined by an FEV1/FVC ratio of <0.7. Additionally, we compared the difference in exposure to risk factors between the COPD and non-COPD groups. Data are presented as number (%). The variables were compared using the χ2 or Fisher’s exact test.

Abbreviation: *C*, cigarette smoking; *I*, infection; *P*, exposure to biomass or pollution; *A*, asthma; *U*, unidentified; *COPD*, chronic obstructive pulmonary disease; *KNHANES,* Korea National Health and Nutrition Examination Survey.

Supplementary Table S2. Risk factors of female subjects in the COPD group and the non-COPD group from the KNHANES

|  | Total  (*n* = 9907) | COPD group  (*n* = 701) | Non-COPD group  (*n* = 9206) | *p*-value |
| --- | --- | --- | --- | --- |
| Risk factors |  |  |  |  |
| C (cigarette smoking) | 277 (2.8%) | 48 (6.8%) | 229 (2.5%) | <0.001 |
| I (infection) | 344 (3.5%) | 67 (9.6%) | 277 (3.0%) | <0.001 |
| P (pollution) | 1155 (11.7%) | 89 (12.7%) | 1066 (11.6%) | 0.374 |
| A (asthma) | 314 (3.2%) | 96 (13.7%) | 218 (2.4%) | <0.001 |
| U (Unidentified) | 7977 (80.5%) | 445 (63.5%) | 7532 (81.8%) | <0.001 |
| Number of risk factors among the above four | |  |  | <0.001 |
| 0 | 7977 (80.5%) | 445 (63.5%) | 7532 (81.8%) |  |
| 1 | 1775 (17.9%) | 214 (30.5%) | 1561 (17.0%) |  |
| 2 | 150 (1.5%) | 40 (5.7%) | 110 (1.2%) |  |
| 3 | 5 (0.1%) | 2 (0.3%) | 3 (0.0%) |  |
| 4 | 0 (0.0%) | 0 (0.0%) | 0 (0.0%) |  |
| C only | 218 (2.2%) | 32 (4.6%) | 186 (2.0%) | <0.001 |
| I only | 271 (2.7%) | 48 (6.8%) | 223 (2.4%) | <0.001 |
| P only | 1052 (10.6%) | 69 (9.8%) | 983 (10.7%) | 0.489 |
| A only | 234 (2.4%) | 65 (9.3%) | 169 (1.8%) | <0.001 |
| C + I | 7 (0.1%) | 1 (0.1%) | 6 (0.1%) | 0.402 |
| C + P | 28 (0.3%) | 4 (0.6%) | 24 (0.3%) | 0.132 |
| C + A | 22 (0.2%) | 10 (1.4%) | 12 (0.1%) | <0.001 |
| I + P | 39 (0.4%) | 6 (0.9%) | 33 (0.4%) | 0.054 |
| I + A | 23 (0.2%) | 11 (1.6%) | 12 (0.1%) | <0.001 |
| P + A | 31 (0.3%) | 8 (1.1%) | 23 (0.2%) | 0.001 |
| C + I + P | 1 (0.0%) | 0 (0.0%) | 1 (0.0%) | >0.999 |
| C + I + A | 0 (0.0%) | 0 (0.0%) | 0 (0.0%) | >0.999 |
| C + P + A | 1 (0.0%) | 1 (0.1%) | 0 (0.0%) | 0.071 |
| I + P + A | 3 (0.0%) | 1 (0.1%) | 2 (0.0%) | 0.198 |

The frequency of exposure to risk factors in female subjects from the KNHANES (data of the general population). We classified study participants into two groups of COPD vs*.* non-COPD. COPD was defined by an FEV1/FVC ratio of <0.7. Additionally, we compared the difference in exposure to risk factors between the COPD and non-COPD groups. Data are presented as number (%). The variables were compared using the χ2 or Fisher’s exact test.

Abbreviation: *C*, cigarette smoking; *I*, infection; *P*, exposure to biomass or pollution; *A*, asthma; *U*, unidentified; *COPD*, chronic obstructive pulmonary disease; *KNHANES,* Korea National Health and Nutrition Examination Survey.

Supplementary Figure S1. Proportion of subjects with COPD from the KNHANES (general population) and from the KOLD (referral clinics) with each combination of risk factors


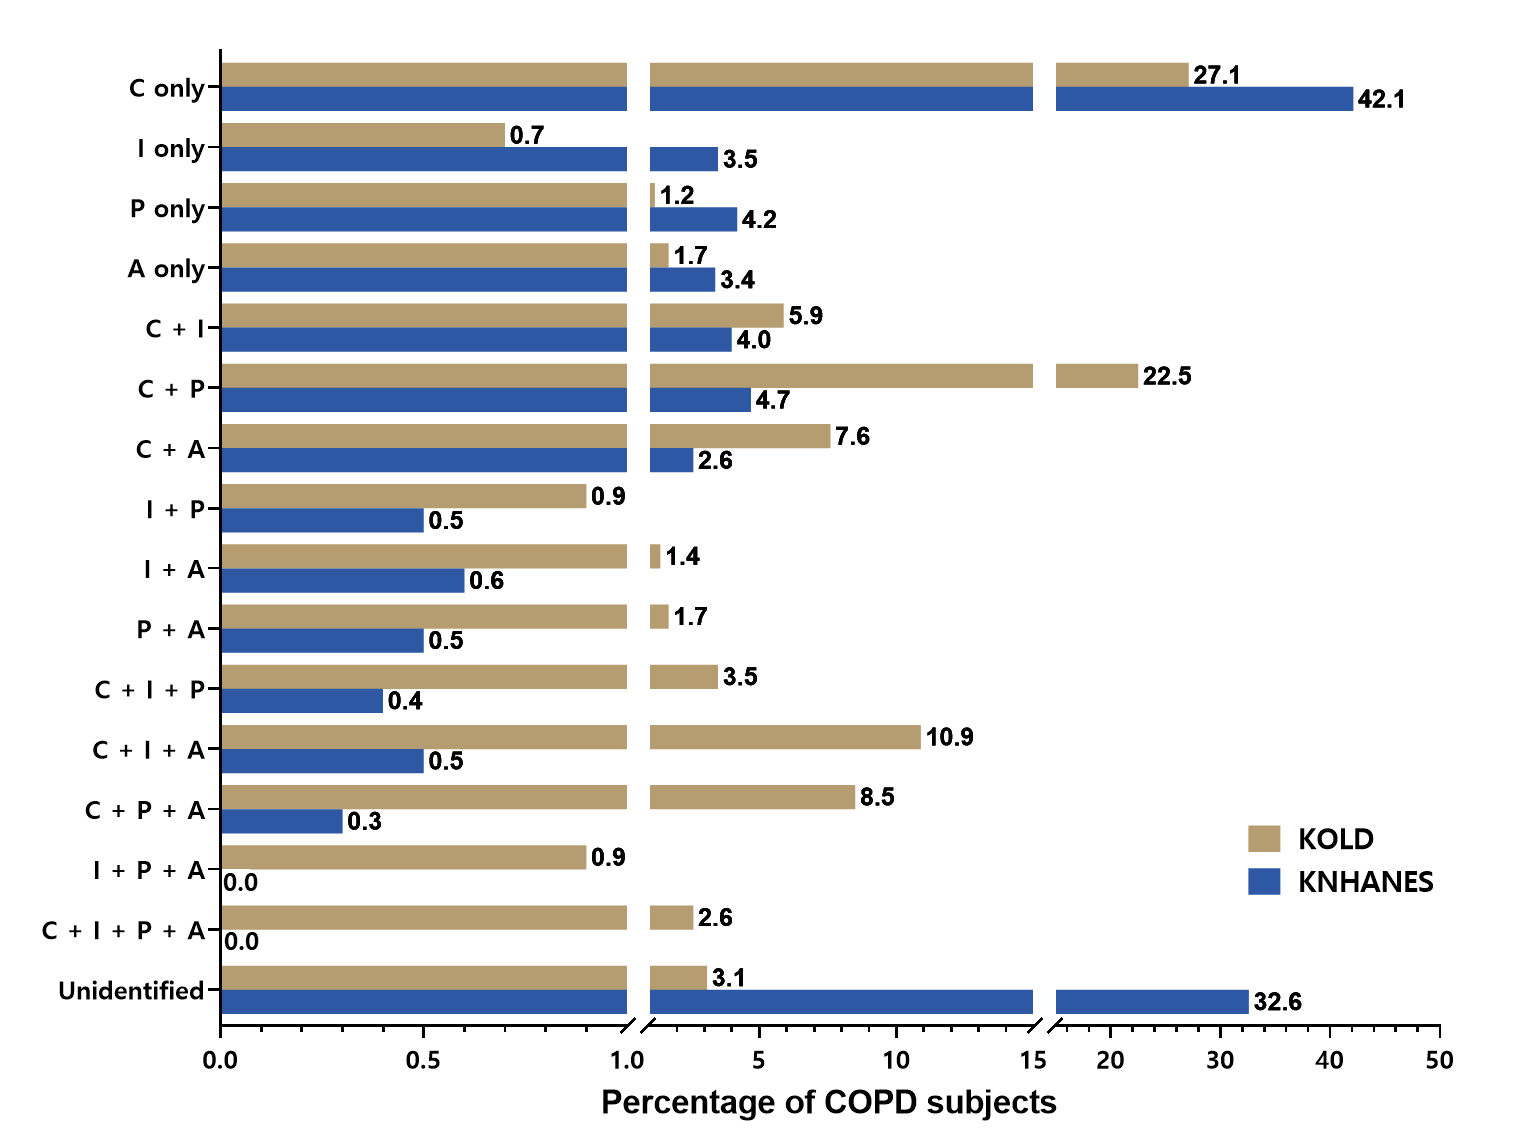


Abbreviation: *C*, cigarette smoking; *I*, infection; *P*, exposure to biomass or pollution; *A*, asthma; *COPD*, chronic obstructive pulmonary disease; *KNHANES*, Korea National Health and Nutrition Examination Survey; *KOLD*, Korean Obstructive Lung Disease cohort.

Supplementary Figure S2. Prevalence of COPD among subjects with risk factors in the KNHANES (general population)


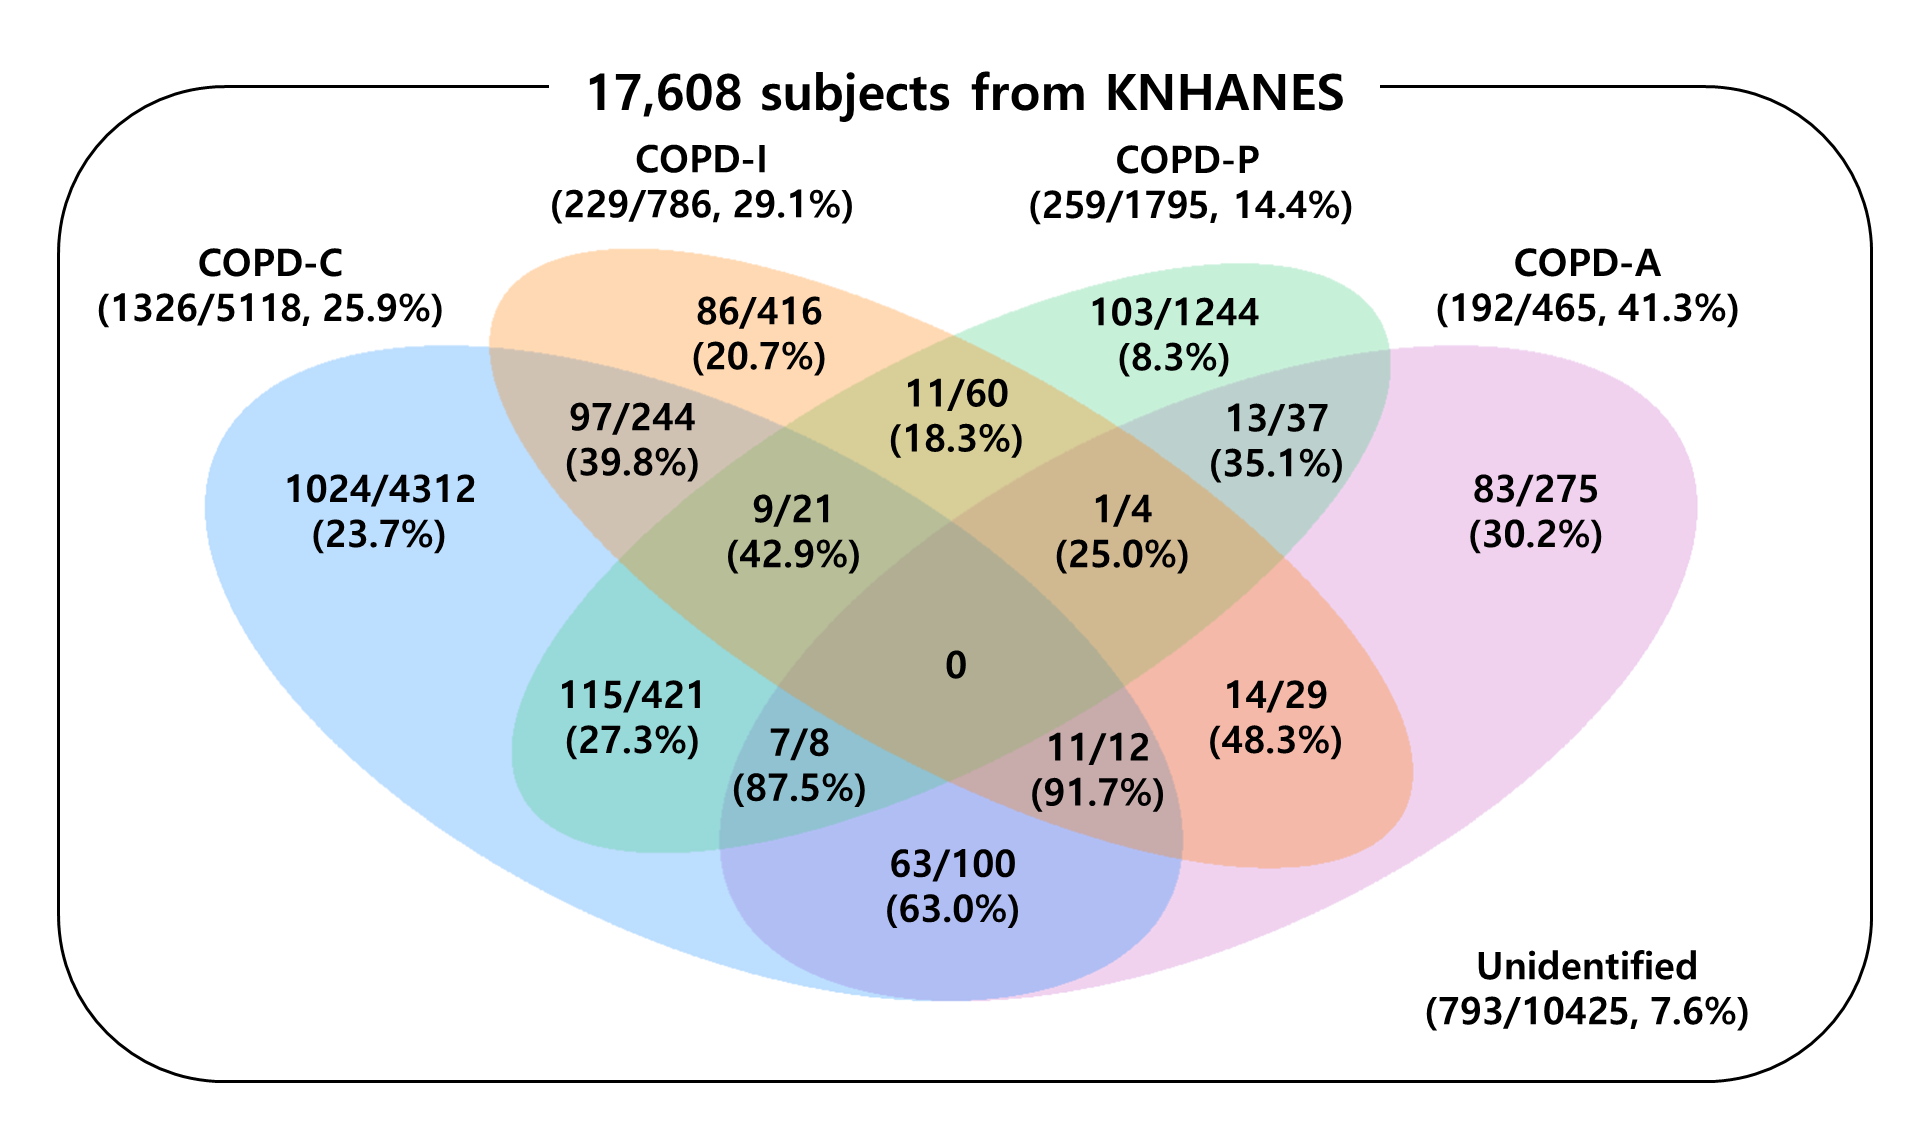


Number and proportion of COPD to total subjects with each combination of risk factors.

Abbreviation: *C*, cigarette smoking; *I*, infection; *P*, exposure to biomass or pollution; *A*, asthma; *COPD*, chronic obstructive pulmonary disease; *KNHANES*, Korea National Health and Nutrition Examination Survey.
